# Supplementary material for: Machine Learning-Based HIV Risk Estimation Using Incidence Rate Ratios
Source: Front Reprod Health. 2021 Dec 2;3:756405. doi: 10.3389/frph.2021.756405 (PMC9580760; doi:10.3389/frph.2021.756405)
Supplement: Supplementary Table 1 — The rules in the final model. [file Table_1.XLSX]

## Sheet: rules
Type	Description	Comment	IRR	P-value
Diagnosis	ICD-9 2724: Other and unspecified hyperlipidemia		0.0696774	2.66454e-15
Diagnosis	ICD-9 4019: Unspecified essential hypertension		0.0937569	0
Diagnosis	ICD-9 42731: Atrial fibrillation		0.102651	5.8547e-06
Service	OBS	Known	0.104872	7.15719e-06
Ward	Labor & Delivery	Known	0.109141	1.03596e-05
Diagnosis	ICD-9 53081: Esophageal reflux		0.10993	5.19407e-12
Ward	Obstetrics (Postpartum & Antepartum)	Known	0.111814	1.29254e-05
Service	CMED	Known	0.118943	3.16192e-12
Diagnosis	ICD-9 V1582: Personal history of tobacco use	Drug Abuse	0.119975	2.50111e-07
Ward	Med/Surg/Trauma	Known	0.121696	2.75564e-05
Procedure	ICD-9 8856: Coronary arteriography using two catheters		0.127845	4.22815e-05
Diagnosis	ICD-9 30000: Anxiety state, unspecified	Psychological Issues	0.129948	5.72513e-06
Diagnosis	ICD-10 I10: Essential (primary) hypertension		0.130888	6.17598e-06
Diagnosis	ICD-9 V5861: Long-term (current) use of anticoagulants	Known	0.134001	6.30652e-05
Diagnosis	ICD-9 5849: Acute kidney failure, unspecified		0.142996	3.33121e-07
Procedure	ICD-9 0040: Procedure on single vessel		0.16047	0.000270328
Diagnosis	ICD-9 78659: Other chest pain		0.16739	0.000373467
Diagnosis	ICD-9 49390: Asthma, unspecified type, unspecified		0.171356	1.78185e-05
Ward	Med/Surg	Known	0.17569	1.55557e-10
MaritalStatus	MARRIED		0.176949	0
Diagnosis	ICD-9 33829: Other chronic pain		0.179761	0.000634973
Diagnosis	ICD-9 2761: Hyposmolality and/or hyponatremia		0.181779	0.000688813
Diagnosis	ICD-9 2859: Anemia, unspecified		0.184235	5.13704e-07
MaritalStatus	WIDOWED		0.194892	1.20873e-06
Ward	Medicine/Cardiology	Known	0.200728	8.67517e-11
Diagnosis	ICD-9 5990: Urinary tract infection, site not specified		0.209258	4.05095e-05
Gender	F	Known	0.218417	0
Ward	Cardiac Surgery	Known	0.230245	0.000354125
Diagnosis	ICD-9 3051: Tobacco use disorder	Drug Abuse	0.230598	1.33169e-05
Diagnosis	ICD-9 311: Depressive disorder, not elsewhere classified	Psychological Issues	0.320822	1.26919e-06
Insurance	Other	Social Factors	0.377965	0
Ward	Neurology	Known	0.395791	5.18105e-05
Ward	PACU	Known	0.424254	0.000258466
Language	ENGLISH		0.438685	2.26176e-10
Ethnicity	WHITE	Known	0.4613	1.11022e-15
Service	ORTHO	Known	0.481408	0.000838376
Service	SURG	Known	0.497436	1.72192e-05
Ward	Emergency Department	Known	0.554452	3.22324e-07
Insurance	Medicare		0.692357	0.000374972
Ethnicity	BLACK/AFRICAN AMERICAN	Known	1.56532	3.57425e-05
Procedure	ICD-9 8938: Other nonoperative respiratory measurements	Known	1.73272	1.01935e-05
Procedure	ICD-9 3899: Other puncture of vein		1.74502	0.000409962
Insurance	Medicaid	Social Factors	1.95679	3.65414e-09
Diagnosis	ICD-9 30500: Alcohol abuse, unspecified	Drug Abuse	1.98633	0.000694576
Procedure	ICD-9 3324: Closed [endoscopic] biopsy of bronchus	Known	2.58096	0.00048425
Gender	M	Known	2.7175	0
MaritalStatus	SINGLE		3.08283	0
Diagnosis	ICD-9 30590: Other, mixed, or unspecified drug abuse, unspecified	Drug Abuse	3.30293	4.49117e-05
Procedure	ICD-9 0331: Spinal tap	Known	4.24706	0
Diagnosis	ICD-10 F4310: Post-traumatic stress disorder, unspecified	Psychological Issues	4.32686	0.000121114
Procedure	ICD-9 8827: Skeletal x-ray of thigh, knee, and lower leg		5.57644	0.000623821
Procedure	ICD-9 8823: Skeletal x-ray of wrist and hand		5.78254	0.000477118
Procedure	ICD-9 9468: Combined alcohol and drug detoxification	Drug Abuse	16.4061	4.9974e-10
